# Supplementary material for: The Presence of Genetic Mutations at Key Loci Predicts Progression to Esophageal Adenocarcinoma in Barrett's Esophagus
Source: PubMed Central journal article supplement — Am J Gastroenterol. 2015 May 26;110(6):828–34. doi: 10.1038/ajg.2015.152 (PMC4471888; doi:10.1038/ajg.2015.152), 2015-05-26
Supplement: ajg2015152x1.pdf [file ajg2015152x1.pdf]

## Supplementary Tables

**Table 1:** Frequency of mutations across the panel of genomic loci in all microdissected histological targets at a baseline time point

| <b>Locus</b> | <b>% Non-progressor targets with each mutation (n=78)</b> | <b>% Progressor targets with each mutation (n=43)</b> |
|--------------|-----------------------------------------------------------|-------------------------------------------------------|
| <b>1p</b>    | 3                                                         | 14                                                    |
| <b>3p</b>    | 6                                                         | 30                                                    |
| <b>5q</b>    | 5                                                         | 37                                                    |
| <b>9p</b>    | 17                                                        | 56                                                    |
| <b>10q</b>   | 5                                                         | 19                                                    |
| <b>17p</b>   | 8                                                         | 40                                                    |
| <b>17q</b>   | 4                                                         | 26                                                    |
| <b>18q</b>   | 3                                                         | 23                                                    |
| <b>21q</b>   | 1                                                         | 9                                                     |
| <b>22q</b>   | 0                                                         | 7                                                     |
